# Supplementary material
Source: Springer Nature journal article supplement (https://www.springermedizin.de/resource/supplementary/13054_2013_2091_MOESM2_ESM.pdf/9712026)

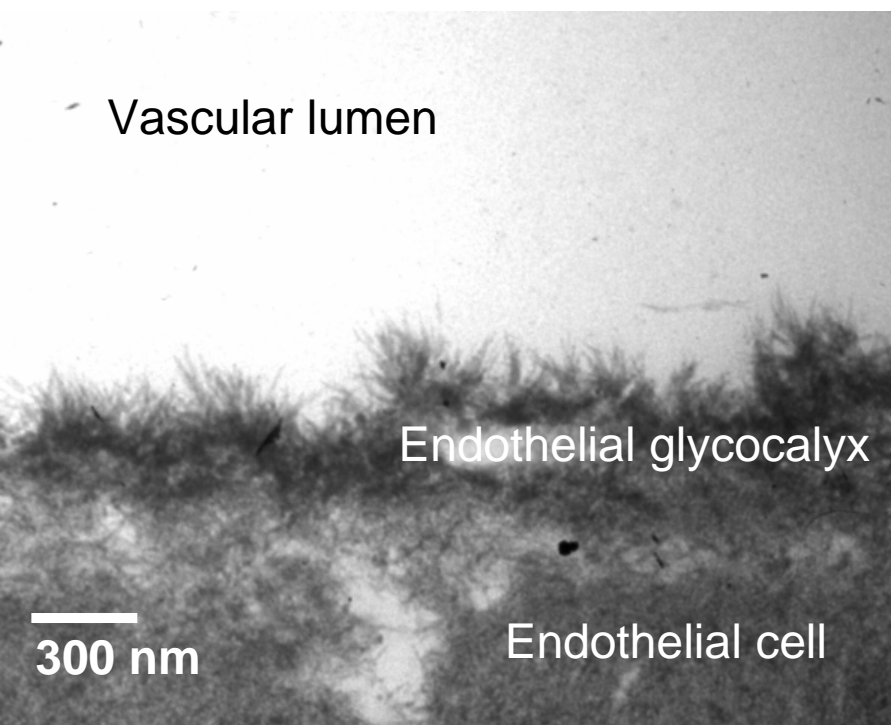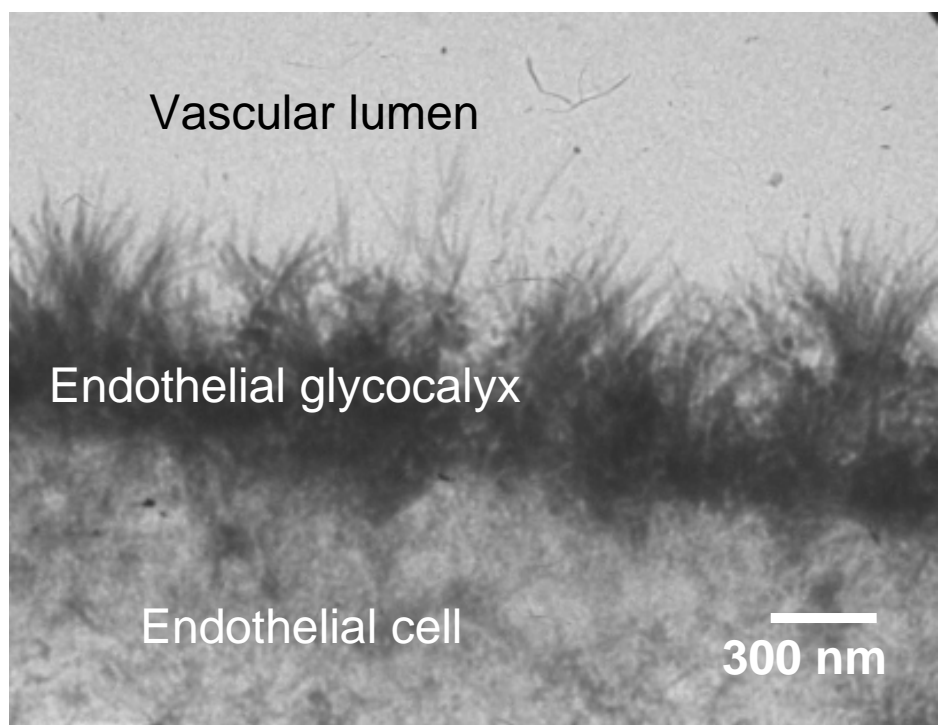

Supplement: MOESM2 [file 9712026]
